# Supplementary material for: Reduced serum iron levels are associated with metabolic dysfunction and sex-specific characteristics
Source: Springer Nature journal article supplement (doi:10.1007/s11739-025-04169-x), 2025-11-06
Supplement: MOESM2 [file 11739_2025_4169_MOESM2_ESM.pdf]

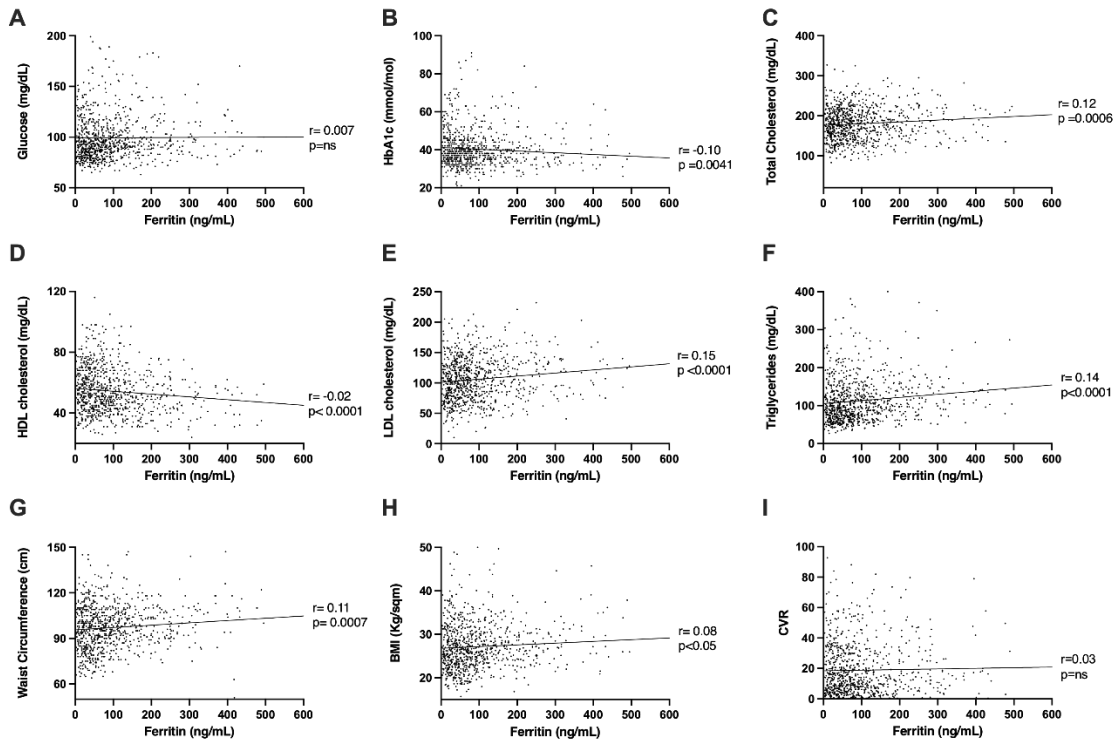

**Supplementary Figure 2. Serum ferritin levels correlations with bio-humoral and clinical parameters in the study population.**

Pearson's correlations ( $r$ ) and corresponding  $p$ -values ( $p$ ). Abbreviations: CVR, cardiovascular risk assessed by Framingham Risk Score.
