# Supplementary figures and images for: Reduced serum iron levels are associated with metabolic dysfunction and sex-specific characteristics
Source: Springer Nature journal article supplement (doi:10.1007/s11739-025-04169-x), 2025-11-06

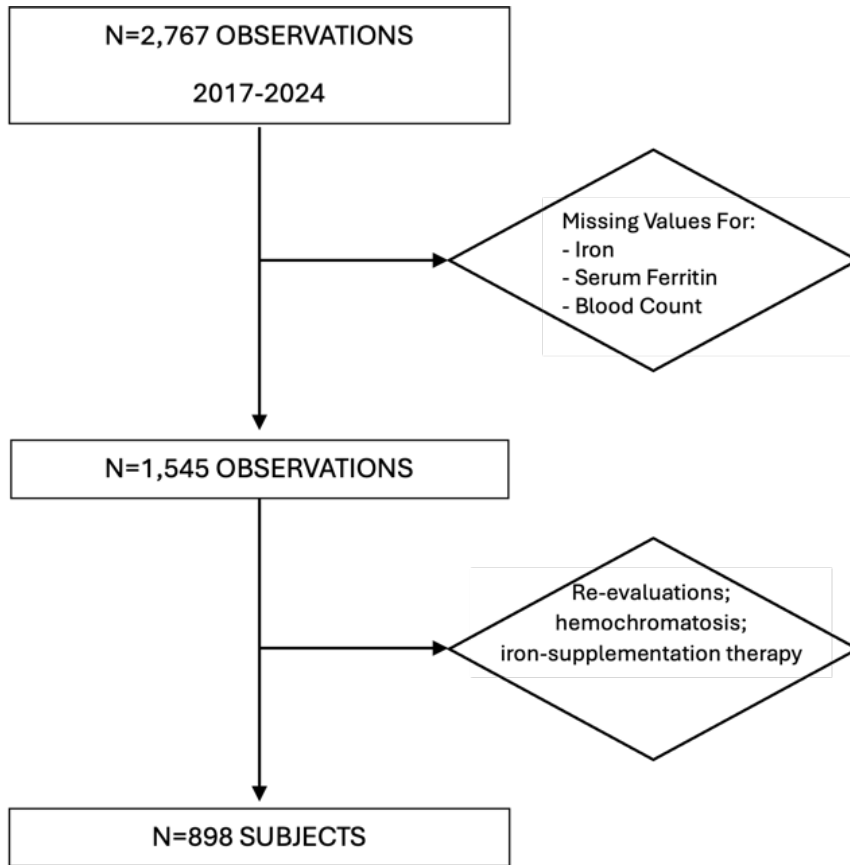

Supplementary Figure 1. Study design.

Supplement: MOESM1 [file 11739_2025_4169_MOESM1_ESM.pdf]
